# Supplementary material for: 1070 オープンジョイントで施工した外壁パネル内外の圧力差について(その1)室内試験と微風速時の現場実測
Source: HighWire-hosted journal article supplement (doi:10.1136/jitc-2021-002746), 1985-09-10
Supplement: jitc-2021-002746supp009_data_supplement.xls [file jitc-2021-002746supp009_data_supplement.xls]

## Sheet: Sheet1
Name	Input			IgG			LINC01140 Probe
hsa-miR-1227-5p	1.15459	1.05453	1.17604	0.124477	0.144796	0.103955	0.649356	1.05803	0.736237
hsa-miR-1253	1.00687	1.25236	1.0537	0.214752	0.166412	0.178981	0.780348	1.00499	1.06093
hsa-miR-125b-2-3p	0.0724037	0.411224	0.237898	0.186892	0.185258	0.115127	0.0920183	0.103704	0.151497
hsa-miR-1273f	0.330826	0.410669	0.646931	0.182259	0.157036	0.113289	0.173849	0.161245	0.186457
hsa-miR-1273h-3p	0.330921	0.83477	0.663596	0.11796	0.0918176	0.113835	0.111395	0.114559	0.0983885
hsa-miR-1299	1.23454	0.986221	1.07691	0.150884	0.168308	0.185579	0.7915	0.706859	0.844595
hsa-miR-130a-5p	1.23319	1.09778	1.14216	0.113201	0.170264	0.141636	0.971551	1.02596	0.905333
hsa-miR-1343-5p	1.10772	1.23205	1.03396	0.117893	0.183964	0.199479	0.767868	0.986228	1.02366
hsa-miR-146b-3p	0.291321	0.462029	0.652934	0.12822	0.210017	0.149273	0.0989447	0.163735	0.140025
hsa-miR-149-5p	0.998262	1.04814	1.04375	0.105095	0.160001	0.17046	0.762224	0.792749	1.1163
hsa-miR-155-5p	1.12072	0.991812	0.992633	0.102082	0.213651	0.204464	0.868515	1.01959	1.02412
hsa-miR-183-3p	1.21925	1.00832	1.05734	0.125507	0.198441	0.0857331	0.969078	0.992612	0.673491
hsa-miR-190a-3p	0.380001	0.759709	0.704715	0.154819	0.140778	0.19793	0.202134	0.158714	0.153721
hsa-miR-203a-3p	1.13975	1.16994	1.05945	0.112464	0.115932	0.208123	0.827194	0.772696	1.05013
hsa-miR-2053	1.1673	1.1066	1.03372	0.151469	0.134671	0.122932	0.663764	1.08345	0.809519
hsa-miR-205-3p	1.15175	1.03234	1.10073	0.11774	0.0952434	0.130682	1.00678	0.871711	0.631533
hsa-miR-20a-3p	0.340613	0.758486	0.364752	0.184919	0.175272	0.0886693	0.200568	0.1786	0.0983448
hsa-miR-20b-3p	0.310656	0.0731735	0.410947	0.137007	0.149979	0.0863521	0.153406	0.134067	0.144003
hsa-miR-2110	0.530613	0.736347	0.505869	0.11429	0.104567	0.204244	0.0960708	0.175652	0.162709
hsa-miR-217	0.589344	0.563126	0.527441	0.159556	0.185209	0.15666	0.14298	0.149661	0.0956443
hsa-miR-222-5p	1.09805	1.03335	1.02822	0.210738	0.151981	0.160932	0.883144	0.892453	0.67367
hsa-miR-23a-3p	1.16305	1.20161	1.10903	0.184221	0.17418	0.125365	0.800978	0.711576	0.914481
hsa-miR-23b-3p	1.13357	1.12283	1.12367	0.0864601	0.0908074	0.151228	0.749298	0.83803	0.842341
hsa-miR-23c	1.19545	1.25509	1.09528	0.113824	0.115263	0.105103	0.842112	0.716323	0.789459
hsa-miR-29a-5p	1.21597	1.07922	1.12621	0.19701	0.151399	0.203534	0.844121	0.978163	0.693767
hsa-miR-300	0.205481	0.192044	0.187044	0.10707	0.140371	0.150386	0.126602	0.154797	0.141576
hsa-miR-3120-5p	1.09534	1.18661	1.02252	0.126617	0.0973588	0.0853828	1.08915	0.73207	0.509842
hsa-miR-3123	0.615129	0.458146	0.756432	0.100277	0.163139	0.147037	0.208212	0.194316	0.0945232
hsa-miR-3129-5p	0.422133	0.551029	0.512021	0.159083	0.134768	0.0895188	0.211747	0.0954403	0.116016
hsa-miR-3162-5p	0.324451	0.483037	0.721094	0.16967	0.0962445	0.177552	0.104897	0.182099	0.0892784
hsa-miR-3166	0.639546	0.267103	0.654387	0.116804	0.0983182	0.117058	0.192595	0.125421	0.0968027
hsa-miR-3173-5p	0.803467	0.706134	0.459771	0.0894599	0.185964	0.128088	0.0873152	0.196178	0.153206
hsa-miR-3189-5p	0.616027	0.513722	0.769461	0.10093	0.160894	0.107958	0.151486	0.151028	0.119746
hsa-miR-3202	0.178272	0.265648	0.266617	0.164626	0.186961	0.212751	0.144304	0.0870179	0.144078
hsa-miR-335-3p	1.09907	1.14106	1.20352	0.0950549	0.0878864	0.199502	0.842616	1.00905	0.825557
hsa-miR-33a-5p	0.999161	1.0473	1.024	0.0901318	0.131773	0.183166	0.723294	1.03825	0.468645
hsa-miR-33b-5p	1.0432	1.21367	1.00398	0.154751	0.157192	0.132047	1.05323	0.762729	0.65517
hsa-miR-345-5p	1.15092	1.08969	1.16527	0.191544	0.196321	0.162647	0.668579	0.92982	0.594195
hsa-miR-34a-3p	1.03094	1.07758	1.10808	0.201722	0.106531	0.184361	0.865723	0.887529	0.888827
hsa-miR-376c-5p	1.07169	1.15624	1.02528	0.0904145	0.142989	0.179405	0.956645	1.03758	0.718643
hsa-miR-377-3p	1.09877	1.25564	1.15689	0.157348	0.104021	0.129571	0.980411	1.09584	0.791403
hsa-miR-378j	0.0776293	0.227921	0.23724	0.159248	0.191092	0.132823	0.200996	0.152278	0.204209
hsa-miR-381-3p	1.21946	1.20581	1.16078	0.209147	0.206599	0.200818	0.995078	0.902548	0.561827
hsa-miR-3908	0.394772	0.720425	0.770063	0.0970741	0.193741	0.138543	0.143556	0.165374	0.145213
hsa-miR-3914	0.754162	0.678861	0.589511	0.0874532	0.183252	0.186297	0.110264	0.100636	0.105431
hsa-miR-3919	0.741243	0.286888	0.741571	0.177489	0.116794	0.123443	0.165221	0.123942	0.120619
hsa-miR-3924	0.285943	0.248329	0.172927	0.102205	0.125178	0.203469	0.13117	0.169904	0.0984924
hsa-miR-3942-3p	0.0825291	0.117442	0.418418	0.100999	0.153071	0.139949	0.106478	0.152266	0.153475
hsa-miR-4271	0.192152	0.0872861	0.319155	0.0928102	0.205721	0.0959923	0.189764	0.0916395	0.212285
hsa-miR-4311	1.12354	1.15553	1.04241	0.211426	0.110176	0.111432	0.165234	0.18206	0.1126
hsa-miR-432-5p	0.977766	0.987021	0.985581	0.182817	0.112815	0.187426	0.730428	0.880417	0.888587
hsa-miR-4421	0.290782	0.724002	0.455145	0.100886	0.118065	0.0892069	0.190918	0.137101	0.137007
hsa-miR-4423-5p	0.586277	0.387079	0.602844	0.148606	0.148586	0.191066	0.109586	0.153234	0.12912
hsa-miR-4452	0.313727	0.640291	0.806739	0.118087	0.109498	0.184643	0.212594	0.163151	0.161503
hsa-miR-4456	0.372627	0.833168	0.746619	0.124658	0.12123	0.210186	0.154145	0.158996	0.178824
hsa-miR-4462	0.0742786	0.17341	0.1795	0.193037	0.157842	0.151475	0.149747	0.191112	0.114567
hsa-miR-4503	0.418167	0.161984	0.0870674	0.152461	0.127261	0.11452	0.155371	0.205872	0.100246
hsa-miR-4510	0.805657	0.770931	0.296976	0.212327	0.0928314	0.0863564	0.178384	0.139005	0.188256
hsa-miR-4513	0.258889	0.280978	0.56817	0.152175	0.0901085	0.190981	0.193495	0.147859	0.133952
hsa-miR-4528	0.6047	0.366521	0.541276	0.101913	0.152023	0.186203	0.155285	0.111115	0.119019
hsa-miR-4639-5p	1.10378	1.09043	1.01735	0.209603	0.180196	0.146383	0.144349	0.185285	0.139144
hsa-miR-4653-3p	0.548368	0.625609	0.757794	0.167829	0.212383	0.213329	0.199096	0.170128	0.181334
hsa-miR-4676-5p	0.287467	0.384319	0.225464	0.202712	0.111903	0.152583	0.156076	0.130732	0.17129
hsa-miR-4677-3p	0.0594466	0.198476	0.419192	0.112814	0.172413	0.129787	0.123527	0.182995	0.118247
hsa-miR-4692	0.413501	0.227956	0.10067	0.145384	0.209162	0.189326	0.149092	0.137868	0.157339
hsa-miR-4700-5p	0.334858	0.654572	0.818456	0.20545	0.109461	0.132215	0.113694	0.203896	0.115376
hsa-miR-4704-3p	0.83308	0.51017	0.697047	0.212441	0.087083	0.110337	0.183071	0.158989	0.124427
hsa-miR-4725-3p	0.545582	0.335849	0.264907	0.13994	0.197569	0.0993794	0.179751	0.17848	0.139683
hsa-miR-4726-5p	0.618733	0.632467	0.658081	0.147425	0.149469	0.085878	0.170165	0.206233	0.154279
hsa-miR-4728-5p	0.319335	0.298165	0.246304	0.164113	0.162816	0.15737	0.211897	0.110146	0.133822
hsa-miR-4735-5p	0.10047	0.157358	0.0684201	0.100348	0.138076	0.185172	0.0897221	0.169542	0.156005
hsa-miR-4742-5p	1.21488	1.11568	1.04511	0.136962	0.151241	0.0851662	0.108337	0.176754	0.116034
hsa-miR-4750-3p	1.21963	0.99222	1.10991	0.178498	0.100682	0.120908	0.799218	0.786513	0.742254
hsa-miR-4775	0.55793	0.4576	0.72343	0.19626	0.113794	0.108015	0.104189	0.191236	0.201054
hsa-miR-4777-3p	0.49654	0.31258	0.603589	0.0977492	0.106624	0.120672	0.183161	0.0904426	0.180411
hsa-miR-4782-5p	0.813262	0.451964	0.33703	0.112452	0.0932007	0.125375	0.105233	0.1014	0.117646
hsa-miR-4789-3p	1.1196	1.2404	1.05796	0.179047	0.0965658	0.0981722	0.116231	0.144516	0.159099
hsa-miR-4797-3p	1.07021	1.22056	1.16654	0.175128	0.135702	0.114277	1.01227	0.846565	0.456827
hsa-miR-5011-5p	0.339319	0.780579	0.623748	0.167839	0.129282	0.0867419	0.171071	0.117773	0.133284
hsa-miR-506-5p	0.384579	0.52514	0.765813	0.121986	0.18805	0.195638	0.127126	0.135702	0.19614
hsa-miR-509-3-5p	0.421994	0.278228	0.159379	0.163892	0.137412	0.0934442	0.188188	0.126132	0.182111
hsa-miR-509-5p	0.148105	0.340902	0.208051	0.0979739	0.157903	0.100098	0.173301	0.189527	0.121235
hsa-miR-5193	0.549095	0.712019	0.283758	0.0950125	0.192608	0.13003	0.115968	0.0938984	0.208469
hsa-miR-541-3p	0.627792	0.73745	0.784667	0.169054	0.0944435	0.184065	0.128495	0.106064	0.128739
hsa-miR-548ak	0.472925	0.402168	0.730323	0.115715	0.205747	0.213009	0.106896	0.125754	0.111969
hsa-miR-548bb-5p	1.17097	1.16333	1.13849	0.121732	0.172455	0.114891	0.119664	0.199547	0.141119
hsa-miR-548c-3p	0.306308	0.182286	0.240936	0.150072	0.195121	0.109403	0.155818	0.137032	0.210288
hsa-miR-548n	0.367359	0.42219	0.24115	0.0869327	0.0976667	0.134935	0.169563	0.137518	0.140841
hsa-miR-548p	0.26569	0.177096	0.417564	0.130677	0.153137	0.145824	0.0957672	0.148566	0.150505
hsa-miR-548w	1.06933	1.20757	1.18195	0.106081	0.20016	0.125018	0.110591	0.191203	0.12204
hsa-miR-550b-2-5p	0.560504	0.523079	0.708426	0.187605	0.18385	0.164963	0.166629	0.142216	0.0881658
hsa-miR-551b-5p	0.503759	0.364447	0.464354	0.0933294	0.0986078	0.155048	0.151983	0.0855458	0.204246
hsa-miR-5580-3p	0.828517	0.811488	0.617763	0.212368	0.130922	0.093154	0.140479	0.207833	0.160081
hsa-miR-5580-5p	1.22927	0.98891	1.0407	0.17276	0.101156	0.100687	0.117767	0.133417	0.13552
hsa-miR-5589-3p	0.993969	1.16618	1.15725	0.136636	0.187348	0.0867095	0.795512	0.934819	0.918199
hsa-miR-559	1.0951	1.10934	1.16944	0.154378	0.104673	0.158	1.04882	0.661726	0.57244
hsa-miR-575	1.12046	1.10834	1.1466	0.212956	0.208492	0.133226	0.144839	0.148828	0.204895
hsa-miR-578	1.12139	1.05996	1.06747	0.160897	0.157929	0.210364	0.675369	1.09676	0.896153
hsa-miR-579-3p	0.0882182	0.314436	0.175866	0.174486	0.204793	0.117998	0.190344	0.122953	0.0876958
hsa-miR-581	0.994817	1.01763	1.16947	0.168129	0.0991363	0.112866	0.957499	0.965989	0.660446
hsa-miR-590-5p	1.02094	1.10709	1.16486	0.145265	0.165372	0.147595	0.81396	0.721176	0.850421
hsa-miR-6124	1.23225	1.02915	1.01779	0.140364	0.0938136	0.144694	0.91097	0.988288	0.789762
hsa-miR-6127	1.04754	0.995375	1.08896	0.0905106	0.17504	0.159566	0.791322	0.708227	0.533027
hsa-miR-6129	0.277676	0.390869	0.196826	0.169213	0.180515	0.183804	0.189876	0.0948934	0.106487
hsa-miR-6130	0.397233	0.325269	0.055082	0.0892652	0.206841	0.0892478	0.090253	0.213524	0.204629
hsa-miR-664b-3p	1.16087	1.16359	1.16443	0.175278	0.106596	0.156664	0.788169	0.811856	0.631911
hsa-miR-6732-3p	1.17717	1.0529	1.02456	0.192314	0.20536	0.086322	0.108979	0.178332	0.175605
hsa-miR-6734-5p	1.05586	1.17381	1.08338	0.175486	0.160456	0.125326	0.869179	0.98166	0.766572
hsa-miR-6740-5p	1.10023	1.15688	1.05708	0.197111	0.160166	0.20145	0.139991	0.137211	0.18724
hsa-miR-6751-5p	0.0608996	0.277766	0.0832591	0.192373	0.205849	0.0861154	0.144696	0.133297	0.172576
hsa-miR-6762-3p	0.260521	0.747616	0.311337	0.108635	0.174094	0.117507	0.158863	0.118477	0.202716
hsa-miR-6764-5p	0.463837	0.77308	0.826984	0.136225	0.174955	0.201552	0.129127	0.199269	0.168808
hsa-miR-6765-3p	0.275583	0.354152	0.323256	0.195842	0.0902044	0.197777	0.176521	0.107443	0.0879912
hsa-miR-6770-5p	0.2491	0.408263	0.0806023	0.177348	0.0912292	0.139467	0.113948	0.172408	0.0861375
hsa-miR-6773-5p	0.0585499	0.0827901	0.403287	0.125565	0.156848	0.180425	0.0936202	0.201518	0.107111
hsa-miR-6780b-5p	0.267935	0.370557	0.465861	0.154254	0.170754	0.134433	0.0898067	0.194121	0.164785
hsa-miR-6785-5p	0.616796	0.816512	0.625488	0.128973	0.129664	0.0938641	0.210744	0.120348	0.142821
hsa-miR-6792-3p	0.684168	0.296902	0.429776	0.199231	0.196686	0.100358	0.156005	0.209341	0.137707
hsa-miR-6799-3p	0.318942	0.29485	0.418699	0.172857	0.175711	0.150339	0.1039	0.0920735	0.175738
hsa-miR-6807-3p	1.01405	1.02992	1.07021	0.148878	0.206407	0.0916476	0.177378	0.09247	0.20351
hsa-miR-6810-5p	0.382897	0.465948	0.833788	0.0958209	0.211808	0.0961785	0.113347	0.104209	0.0965162
hsa-miR-6814-5p	0.495301	0.341801	0.281549	0.208539	0.15747	0.163127	0.175301	0.176912	0.133934
hsa-miR-6829-5p	0.614991	0.603974	0.670431	0.175079	0.0988597	0.199129	0.162966	0.189195	0.207857
hsa-miR-6839-5p	0.417746	0.780397	0.714934	0.208558	0.148319	0.19416	0.115469	0.169499	0.139334
hsa-miR-6849-5p	0.17342	0.324562	0.11704	0.184311	0.198329	0.173554	0.17234	0.173637	0.122534
hsa-miR-6855-3p	0.23488	0.1124	0.333502	0.110251	0.100478	0.124373	0.10913	0.0886999	0.102378
hsa-miR-6858-3p	0.167836	0.281551	0.428899	0.172973	0.103112	0.154208	0.174294	0.176551	0.0953208
hsa-miR-6883-5p	1.14371	1.20028	1.10618	0.161673	0.162384	0.174576	0.933405	0.855764	0.758162
hsa-miR-6889-3p	0.267358	0.333293	0.36796	0.0906789	0.155513	0.205433	0.119814	0.180358	0.152395
hsa-miR-7161-3p	1.02977	1.18543	1.02338	0.134385	0.108493	0.193025	0.797968	0.872022	0.552396
hsa-miR-744-3p	0.981164	1.00616	1.19078	0.0915174	0.164154	0.158831	1.05432	1.0583	0.642058
hsa-miR-7856-5p	0.408229	0.096465	0.158917	0.132081	0.198629	0.204878	0.11839	0.100382	0.141809
hsa-miR-8068	0.326945	0.353771	0.227215	0.198548	0.114197	0.163033	0.144297	0.0899105	0.0892086
hsa-miR-875-5p	1.04806	1.15099	1.04803	0.122357	0.105532	0.0921311	0.0881424	0.191807	0.103048
hsa-miR-939-5p	1.13446	1.03713	1.1004	0.089874	0.139674	0.129097	0.928833	0.880703	0.908991
hsa-miR-943	0.132771	0.16893	0.270031	0.134412	0.108616	0.174542	0.184814	0.189788	0.138329
hsa-miR-944	1.22101	1.19434	1.12847	0.0915417	0.142881	0.192193	0.972449	0.866324	0.541117
hsa-miR-98-3p	1.20904	1.06407	1.08913	0.0852133	0.110167	0.148146	0.957289	1.08508	0.830032
