# Supplementary material for: 1070 オープンジョイントで施工した外壁パネル内外の圧力差について(その1)室内試験と微風速時の現場実測
Source: HighWire-hosted journal article supplement (doi:10.1136/jitc-2021-002746), 1985-09-10
Supplement: jitc-2021-002746supp025_data_supplement.xlsx [file jitc-2021-002746supp025_data_supplement.xlsx]

## Sheet: sheet 1
Variants for LINC01140 Gene
1. Structural Variations from Database of Genomic Variants (DGV) for LINC01140 Gene
Variant ID	Type	Subtype	PubMed ID
esv23870	CNV	gain	19812545
nsv1788	CNV	insertion	18451855
nsv437812	CNV	loss	16327808
2. Forty-five SNP loci in LINC01140 from LincSNP database
ID	SNP chr	SNP_start	SNP_end	population	diseases/trait	geno	Pubmed	Name	Transcript start	Transcript end	chr	gene_start	gene_end	gene_id	trans_id	trans_name	gene_type	trans_type	exonnum
rs719015	chr1	87146027	87146027	Mixed	Tourette's syndrome	C/T	22889924	LINC01140	87129765	87168505	chr1	87129765	87169198	ENSG00000267272.5	ENST00000469312.6	LINC01140-203	lincRNA	lincRNA	4
rs927725	chr1	87142851	87142851	European	Fasting insulin	A/G	20081858	LINC01140	87129765	87168505	chr1	87129765	87169198	ENSG00000267272.5	ENST00000469312.6	LINC01140-203	lincRNA	lincRNA	4
rs1886632	chr1	87144563	87144563	European	HOMA-IR	C/T	20081858	LINC01140	87129765	87168505	chr1	87129765	87169198	ENSG00000267272.5	ENST00000469312.6	LINC01140-203	lincRNA	lincRNA	4
rs2807946	chr1	87131774	87131774	Mixed	Autism	A/C	20663923	LINC01140	87129765	87168505	chr1	87129765	87169198	ENSG00000267272.5	ENST00000469312.6	LINC01140-203	lincRNA	lincRNA	4
rs4415539	chr1	87138562	87138562	European	Serum ratio of (1-palmitoylglycerophosphoinositol*)/(phenylacetate)	C/T	21886157	LINC01140	87129765	87168505	chr1	87129765	87169198	ENSG00000267272.5	ENST00000469312.6	LINC01140-203	lincRNA	lincRNA	4
rs4655923	chr1	87142379	87142379	European	Fasting insulin	A/C	20081858	LINC01140	87129765	87168505	chr1	87129765	87169198	ENSG00000267272.5	ENST00000469312.6	LINC01140-203	lincRNA	lincRNA	4
rs6576865	chr1	87134014	87134014	European	Fasting insulin	A/G	20081858	LINC01140	87129765	87168505	chr1	87129765	87169198	ENSG00000267272.5	ENST00000469312.6	LINC01140-203	lincRNA	lincRNA	4
rs6576866	chr1	87135788	87135788	European	Serum ratio of (linolenate [alpha or gamma; (18:3n3 or 6)])/(palmitoleate (16:1n7))	C/T	21886157	LINC01140	87129765	87168505	chr1	87129765	87169198	ENSG00000267272.5	ENST00000469312.6	LINC01140-203	lincRNA	lincRNA	4
rs12403958	chr1	87145048	87145048	European	Birth weight	A/G	23202124	LINC01140	87129765	87168505	chr1	87129765	87169198	ENSG00000267272.5	ENST00000469312.6	LINC01140-203	lincRNA	lincRNA	4
rs12405406	chr1	87143826	87143826	European	Birth weight	A/G	23202124	LINC01140	87129765	87168505	chr1	87129765	87169198	ENSG00000267272.5	ENST00000469312.6	LINC01140-203	lincRNA	lincRNA	4
rs1886634	chr1	87149138	87149138	Mixed	Tourette's syndrome	C/T	22889924	LINC01140	87129765	87168505	chr1	87129765	87169198	ENSG00000267272.5	ENST00000469312.6	LINC01140-203	lincRNA	lincRNA	4
rs6576869	chr1	87160846	87160846	European	Adiponectin levels	C/T	22479202	LINC01140	87129765	87168505	chr1	87129765	87169198	ENSG00000267272.5	ENST00000469312.6	LINC01140-203	lincRNA	lincRNA	4
rs6663703	chr1	87151258	87151258	European	Years of education	A/C	23722424	LINC01140	87129765	87168505	chr1	87129765	87169198	ENSG00000267272.5	ENST00000469312.6	LINC01140-203	lincRNA	lincRNA	4
rs6675309	chr1	87159046	87159046	European	Years of education	C/T	23722424	LINC01140	87129765	87168505	chr1	87129765	87169198	ENSG00000267272.5	ENST00000469312.6	LINC01140-203	lincRNA	lincRNA	4
rs6679545	chr1	87160680	87160680	European	Years of education	C/T	23722424	LINC01140	87129765	87168505	chr1	87129765	87169198	ENSG00000267272.5	ENST00000469312.6	LINC01140-203	lincRNA	lincRNA	4
rs6689763	chr1	87148536	87148536	European	Serum ratio of (2-linoleoylglycerophosphoethanolamine*)/(phenylacetate)	C/T	21886157	LINC01140	87129765	87168505	chr1	87129765	87169198	ENSG00000267272.5	ENST00000469312.6	LINC01140-203	lincRNA	lincRNA	4
rs7516494	chr1	87147585	87147585	European	Fasting insulin	A/G	20081858	LINC01140	87129765	87168505	chr1	87129765	87169198	ENSG00000267272.5	ENST00000469312.6	LINC01140-203	lincRNA	lincRNA	4
rs7539833	chr1	87147545	87147545	European/Unspecified	Gene expression of LMO4 [transcript NM_006769, probe A_23_P380181] in liver	C/G	21637794	LINC01140	87129765	87168505	chr1	87129765	87169198	ENSG00000267272.5	ENST00000469312.6	LINC01140-203	lincRNA	lincRNA	4
rs7553864	chr1	87147675	87147675	NOPOP|ALL	SMKDU	T/C	19247474	LINC01140	87129765	87168505	chr1	87129765	87169198	ENSG00000267272.5	ENST00000469312.6	LINC01140-203	lincRNA	lincRNA	4
rs10493795	chr1	87149071	87149071	European	Cystatin C in serum	A/G	20383146	LINC01140	87129765	87168505	chr1	87129765	87169198	ENSG00000267272.5	ENST00000469312.6	LINC01140-203	lincRNA	lincRNA	4
rs10493796	chr1	87148492	87148492	European	Fasting insulin	C/T	20081858	LINC01140	87129765	87168505	chr1	87129765	87169198	ENSG00000267272.5	ENST00000469312.6	LINC01140-203	lincRNA	lincRNA	4
rs10747340	chr1	87161527	87161527	European	Adiponectin levels	C/T	22479202	LINC01140	87129765	87168505	chr1	87129765	87169198	ENSG00000267272.5	ENST00000469312.6	LINC01140-203	lincRNA	lincRNA	4
rs10873821	chr1	87162490	87162490	European	Birth weight	C/T	23202124	LINC01140	87129765	87168505	chr1	87129765	87169198	ENSG00000267272.5	ENST00000469312.6	LINC01140-203	lincRNA	lincRNA	4
rs12136695	chr1	87149729	87149729	European	HOMA-B	A/G	20081858	LINC01140	87129765	87168505	chr1	87129765	87169198	ENSG00000267272.5	ENST00000469312.6	LINC01140-203	lincRNA	lincRNA	4
rs12409743	chr1	87159615	87159615	European	Birth weight	A/G	23202124	LINC01140	87129765	87168505	chr1	87129765	87169198	ENSG00000267272.5	ENST00000469312.6	LINC01140-203	lincRNA	lincRNA	4
rs6673642	chr1	87156233	87156233	European	Adiponectin levels	C/G	22479202	LINC01140	87129765	87168505	chr1	87129765	87169198	ENSG00000267272.5	ENST00000469312.6	LINC01140-203	lincRNA	lincRNA	4
rs6678594	chr1	87152555	87152555	European	Adiponectin levels	A/G	22479202	LINC01140	87129765	87168505	chr1	87129765	87169198	ENSG00000267272.5	ENST00000469312.6	LINC01140-203	lincRNA	lincRNA	4
rs6703449	chr1	87152524	87152524	European	Years of education	C/T	23722424	LINC01140	87129765	87168505	chr1	87129765	87169198	ENSG00000267272.5	ENST00000469312.6	LINC01140-203	lincRNA	lincRNA	4
rs11161938	chr1	87162546	87162546	European	Birth weight	C/T	23202124	LINC01140	87129765	87168505	chr1	87129765	87169198	ENSG00000267272.5	ENST00000469312.6	LINC01140-203	lincRNA	lincRNA	4
rs2390267	chr1	87166064	87166064	European	Birth weight	A/T	23202124	LINC01140	87129765	87168505	chr1	87129765	87169198	ENSG00000267272.5	ENST00000469312.6	LINC01140-203	lincRNA	lincRNA	4
rs12092928	chr1	87163151	87163151	European	Birth weight	C/T	23202124	LINC01140	87129765	87168505	chr1	87129765	87169198	ENSG00000267272.5	ENST00000469312.6	LINC01140-203	lincRNA	lincRNA	4
rs17129854	chr1	87163810	87163810	European	Birth weight	C/T	23202124	LINC01140	87129765	87168505	chr1	87129765	87169198	ENSG00000267272.5	ENST00000469312.6	LINC01140-203	lincRNA	lincRNA	4
rs17129860	chr1	87168246	87168246	European	Birth weight	A/G	23202124	LINC01140	87129765	87168505	chr1	87129765	87169198	ENSG00000267272.5	ENST00000469312.6	LINC01140-203	lincRNA	lincRNA	4
rs1006327	chr1	87167337	87167337	European	Birth weight	A/C	23202124	LINC01140	87129765	87168505	chr1	87129765	87169198	ENSG00000267272.5	ENST00000469312.6	LINC01140-203	lincRNA	lincRNA	4
rs1998713	chr1	87167794	87167794	European	Adiponectin levels	C/T	22479202	LINC01140	87129765	87168505	chr1	87129765	87169198	ENSG00000267272.5	ENST00000469312.6	LINC01140-203	lincRNA	lincRNA	4
rs4540630	chr1	87166091	87166091	Mixed	Advanced age-related macular degeneration (choroidal neovascularization) vs. no AMD	C/T	23455636	LINC01140	87129765	87168505	chr1	87129765	87169198	ENSG00000267272.5	ENST00000469312.6	LINC01140-203	lincRNA	lincRNA	4
rs4655841	chr1	87166671	87166671	European	Birth weight	A/G	23202124	LINC01140	87129765	87168505	chr1	87129765	87169198	ENSG00000267272.5	ENST00000469312.6	LINC01140-203	lincRNA	lincRNA	4
rs7550642	chr1	87163627	87163627	European	Birth weight	A/G	23202124	LINC01140	87129765	87168505	chr1	87129765	87169198	ENSG00000267272.5	ENST00000469312.6	LINC01140-203	lincRNA	lincRNA	4
rs10782593	chr1	87168078	87168078	European	Adiponectin levels	C/T	22479202	LINC01140	87129765	87168505	chr1	87129765	87169198	ENSG00000267272.5	ENST00000469312.6	LINC01140-203	lincRNA	lincRNA	4
rs11161939	chr1	87163185	87163185	Mixed	Advanced age-related macular degeneration (choroidal neovascularization) vs. no AMD	A/G	23455636	LINC01140	87129765	87168505	chr1	87129765	87169198	ENSG00000267272.5	ENST00000469312.6	LINC01140-203	lincRNA	lincRNA	4
rs11161940	chr1	87164437	87164437	European	Birth weight	A/G	23202124	LINC01140	87129765	87168505	chr1	87129765	87169198	ENSG00000267272.5	ENST00000469312.6	LINC01140-203	lincRNA	lincRNA	4
rs11161941	chr1	87164647	87164647	European	Birth weight	C/T	23202124	LINC01140	87129765	87168505	chr1	87129765	87169198	ENSG00000267272.5	ENST00000469312.6	LINC01140-203	lincRNA	lincRNA	4
rs12087707	chr1	87163352	87163352	European	Birth weight	A/G	23202124	LINC01140	87129765	87168505	chr1	87129765	87169198	ENSG00000267272.5	ENST00000469312.6	LINC01140-203	lincRNA	lincRNA	4
rs12096053	chr1	87167682	87167682	Mixed	Advanced age-related macular degeneration (choroidal neovascularization) vs. no AMD	A/T	23455636	LINC01140	87129765	87168505	chr1	87129765	87169198	ENSG00000267272.5	ENST00000469312.6	LINC01140-203	lincRNA	lincRNA	4
rs12402557	chr1	87165966	87165966	European	Birth weight	C/T	23202124	LINC01140	87129765	87168505	chr1	87129765	87169198	ENSG00000267272.5	ENST00000469312.6	LINC01140-203	lincRNA	lincRNA	4
